# Supplementary material
Source: PubMed Central journal article supplement (PMC5915724)
Supplement: rstb20170150supp1.pdf [file rstb20170150supp1.pdf]

Paolo Mellini, Biagina Marrocco, Diana Borovika, Lucia Polletta, Ilaria Carnevale, Serena Saladini, Giulia Stazi, Clemens Zwergel, Peteris Trapencieris, Elisabetta Ferretti, Marco Tafani,\* Sergio Valente,\* and Antonello Mai\*

## Pyrazole-based inhibitors of Enhancer of Zeste Homolog 2 induce apoptosis and autophagy in cancer cells

### SUPPLEMENTARY MATERIAL

#### Content:

|                                                                                                                                                                                                                |        |
|----------------------------------------------------------------------------------------------------------------------------------------------------------------------------------------------------------------|--------|
| <b>Chemistry. Scheme S1. Experimental Section</b>                                                                                                                                                              | p. S2  |
| <b>Table S1.</b> Chemical and Physical Data of Compounds <b>1a-r</b>                                                                                                                                           | p. S4  |
| <b>Table S2.</b> Chemical and Physical Data of the Intermediates <b>3a-e</b>                                                                                                                                   | p. S8  |
| <b>Table S3.</b> Chemical and Physical Data of the Intermediates <b>2a-d</b> and <b>4a-q</b> .                                                                                                                 | p. S9  |
| <b>Table S4.</b> Chemical and Physical Data of the Intermediates <b>5a-q</b> .                                                                                                                                 | p. S11 |
| <b>Table S5.</b> Elemental Analyses for Compounds <b>1a-r</b> .                                                                                                                                                | p. S13 |
| <b>Spectral Data for Compounds 1a-r.</b>                                                                                                                                                                       | p. S14 |
| <b>Figure S1.</b> Determination of IC <sub>50</sub> values against EZH2/PRC2 for <b>1n</b> , <b>1o</b> , <b>1p</b> , and <b>1q</b> .                                                                           | p. S18 |
| <b>Figure S2.</b> SAM competition experiments.                                                                                                                                                                 | p. S19 |
| <b>Figure S3.</b> Cytotoxicity of <b>1o</b> and GSK126 in non-cancer cells.                                                                                                                                    | p. S20 |
| <b>Figure S4.</b> SK-N-BE and K562 cells were either left untreated or treated with 0.5, 1 and 5 $\mu$ M <b>1o</b> for 2, 4 and 6 days. Cell morphology was evaluated by optical microscopy and picture taken. | p. S21 |
| <b>Figure S5.</b> Western blot analysis showing the levels of H3K4me3 and histone H3 after treatment with GSK126 and <b>1o</b> (both at 1 $\mu$ M) in SK-N-BE and K562 cells.                                  | p. S22 |
| <b>References</b>                                                                                                                                                                                              | p. S23 |

## Chemistry

The ethyl esters **4a-q**, key intermediate compounds for the synthesis of the desired pyrazoles **1a-q**, were prepared either by Clauson-Kaas reaction between the known 5-amino-4-ethoxycarbonyl pyrazoles **2a-d** [1] and 2,5-dimethoxytetrahydrofuran in glacial acetic acid at 80°C (compounds **4a-d**), or from the enamines **3a-e** prepared according to the literature [2], which underwent cyclocondensation with the proper commercial hydrazines in ethanol at 80°C (compounds **4e-q**). The esters **4a-q** were hydrolyzed in basic conditions with 2 N potassium hydroxide in ethanol to give the corresponding 4-pyrazolecarboxylic acids **5a-q**, which in presence of triethylamine, *N,N,N',N'*-tetramethyl-*O*-(benzotriazol-1-yl)uronium tetrafluoroborate (TBTU), dry *N,N*-dimethylformamide were coupled under nitrogen atmosphere with the amine **6** [3] to yield the final amides **1a-q** (see ref. 4 for **1o,p**) (Scheme S1).

The *N*-((4,6-dimethyl-2-oxo-1,2-dihydropyridin-3-yl)methyl)-2-(5-methyl-1-phenyl-1*H*-pyrazol-4-yl)acetamide **1r** was prepared by coupling the known 2-(5-methyl-1-phenyl-1*H*-pyrazol-4-yl)acetic acid [5] with **6** following the same procedure described for **1a-q**.

Physical, chemical and spectral data for intermediate compounds **2-5** and the final compounds **1a-r** are reported below in Tables S1-S5.

### Scheme S1. Synthesis of **1a-q**.

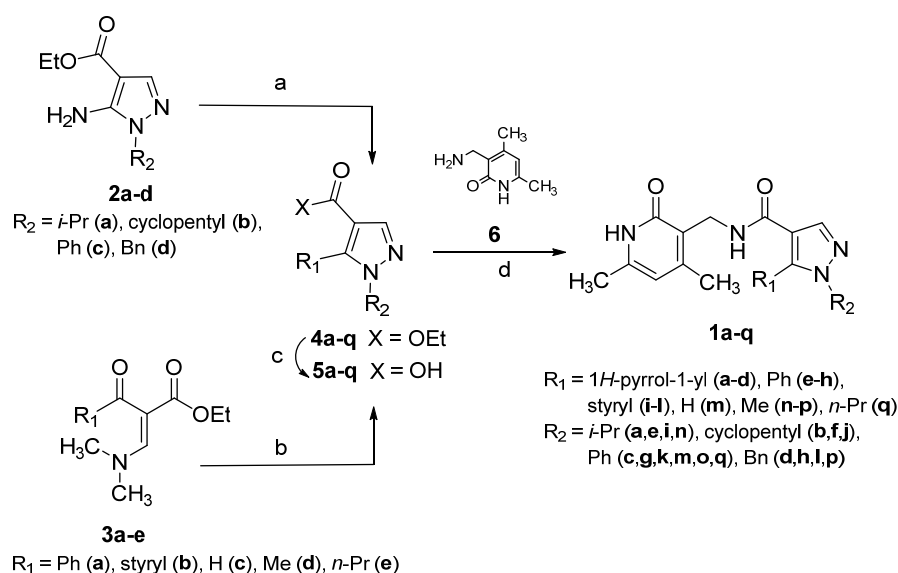

Reagents and conditions (a) 2,5-dimethoxytetrahydrofuran, glacial acetic acid, 80°C, (1-6 h); (b) proper hydrazine, ethanol, 80°C or rt; (c) 2 N potassium hydroxide, ethanol, rt, overnight; (d) TBTU, triethylamine, dry DMF, N<sub>2</sub>, rt, overnight.

## Experimental Section

**General procedure for the synthesis of 5-pyrrolyl-pyrazole ethyl esters 4a-d.** 2,5-Dimethoxytetrahydrofuran (6.72 mmol) was added to a solution of the known appropriate 1-substituted ethyl 5-amino-1*H*-pyrazole-4-carboxylate **2** (4.48 mmol) in acetic acid (6 ml), and the reaction mixture was refluxed for 1 h. Then, 5 ml of toluene were added, the solution was concentrated under reduced pressure, and the residue was purified by chromatography on silica gel (eluent: ethyl acetate:*n*-hexane = 1:8) to furnish the desired pyrrole derivative (see Table S3).

**General procedure for the synthesis of pyrazole esters 4e-q.** The proper hydrazine (1.01 mmol) and triethylamine (2.02 mmol) were added to a solution of the known appropriate ethyl 2-acyl-3-(dimethylamino)acrylate **3** (1.01 mmol) in ethanol (5 ml), and the reaction mixture was refluxed for 2 h. After the completion of the reaction, the solvent was evaporated by 90% and water (20 ml) was added to the residue. The aqueous phase was extracted with dichloromethane (3 × 50 ml), the organic phase washed with sodium hydrogen carbonate (2 × 15 ml) and sodium chloride (2 × 10 ml) saturated solutions, dried over sodium sulphate and concentrated under reduced pressure to obtain the ethyl 1*H*-pyrazole-4-carboxylates **4e-q** (see Table S3), differently substituted at the N1 and C5 positions, which were used in the following step without further purification.

**General procedure for the synthesis of pyrazole-4-carboxylic acids 5a-q.** The appropriate ethyl 1*H*-pyrazole-4-carboxylate **4** (1.82 mmol) was suspended in ethanol (6 ml), then 2 N KOH (3.64 ml) was added and the resulting mixture was left stirring at room temperature. After 16 h the reaction was complete, the ethanol was concentrated under vacuum and 2 N HCl was added to the residue till pH = 2. The obtained precipitate was filtered off, washed with distilled water (3 × 3 ml) and dried at 60°C to give the corresponding 1,5-disubstituted 1*H*-pyrazole-4-carboxylic acid **5** (see Table S4).

**Table S1.** Chemical and Physical Data of Compounds **1a-r**.

| <b>Cpd</b> | <b>Lab Code</b> | <b>Molecule structure</b>                                                           | <b>m. p. (°C)</b> | <b>recrystallization solvent</b> | <b>yield (%)</b> |
|------------|-----------------|-------------------------------------------------------------------------------------|-------------------|----------------------------------|------------------|
| <b>1a</b>  | MC3600          | 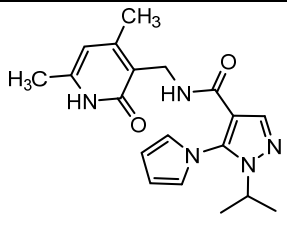   | 229-231           | methanol                         | 66               |
| <b>1b</b>  | MC3601          |   | 208-210           | acetonitrile/methanol            | 61               |
| <b>1c</b>  | MC3584          |  | 232-235           | methanol                         | 68               |
| <b>1d</b>  | MC3589          |  | 187-189           | acetonitrile                     | 65               |
| <b>1e</b>  | MC3599          |  | 211-213           | acetonitrile/methanol            | 67               |

|           |        |                                                                                     |         |                       |    |
|-----------|--------|-------------------------------------------------------------------------------------|---------|-----------------------|----|
| <b>1f</b> | MC3602 | 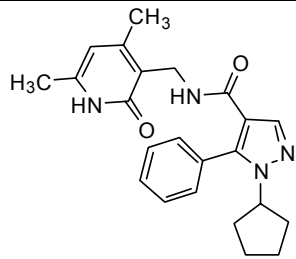   | 213-215 | acetonitrile/methanol | 59 |
| <b>1g</b> | MC3590 |    | 206-208 | acetonitrile/methanol | 57 |
| <b>1h</b> | MC3598 |   | 181-183 | acetonitrile          | 62 |
| <b>1i</b> | MC3625 |  | 223-225 | methanol              | 64 |
| <b>1j</b> | MC3627 |  | 192-194 | acetonitrile          | 63 |

|                 |        |                                                                                     |         |              |    |
|-----------------|--------|-------------------------------------------------------------------------------------|---------|--------------|----|
| <b>1k</b>       | MC3648 | 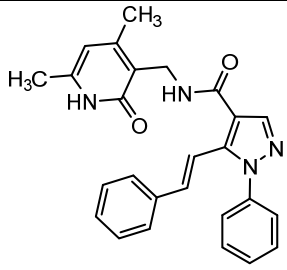   | 231-233 | methanol     | 62 |
| <b>1l</b>       | MC3630 |    | 195-197 | acetonitrile | 58 |
| <b>1m</b>       | MC3715 |   | >250    | methanol     | 67 |
| <b>1n</b>       | MC3690 |  | 194-196 | acetonitrile | 57 |
| <b>1o</b> [4,6] | MC3629 |  | 225-227 | methanol     | 60 |
| <b>1p</b> [4]   | MC3702 |  | 219-221 | methanol     | 51 |

|           |        |                                                                                   |         |                       |    |
|-----------|--------|-----------------------------------------------------------------------------------|---------|-----------------------|----|
| <b>1q</b> | MC3623 | 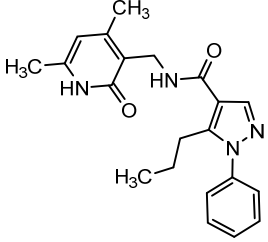 | 204-206 | acetonitrile/methanol | 60 |
| <b>1r</b> | MC3710 |  | 215-217 | acetonitrile/methanol | 66 |

**Table S2.** Chemical and Physical Data of the Intermediates **3a-e**

| 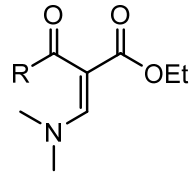<br><b>3a-e</b> |                                                                                   |                   |                                  |                  |
|--------------------------------------------------------------------------------------------------|-----------------------------------------------------------------------------------|-------------------|----------------------------------|------------------|
| <b>Cpd</b>                                                                                       | <b>R</b>                                                                          | <b>m. p. (°C)</b> | <b>recrystallization solvent</b> | <b>yield (%)</b> |
| <b>3a</b> [7]                                                                                    |  | 64-66             | cyclohexane                      | 78               |
| <b>3b</b> [8]                                                                                    |  | oil               | -                                | 72               |
| <b>3c</b> [9]                                                                                    | -H                                                                                | 150-152           | toluene                          | 65               |
| <b>3d</b> [10]                                                                                   | -CH <sub>3</sub>                                                                  | 43-45             | hexane                           | 77               |
| <b>3e</b> [8]                                                                                    | -CH <sub>2</sub> CH <sub>2</sub> CH <sub>3</sub>                                  | 112-114           | cyclohexane                      | 69               |



**Table S3.** Chemical and Physical Data of the Intermediates **2a-d** and **4a-q**.

| 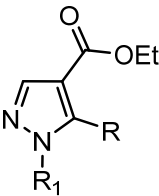<br><b>2a-d, 4a-q</b> |                                                                                     |                |            |                           |           |
|--------------------------------------------------------------------------------------------------------|-------------------------------------------------------------------------------------|----------------|------------|---------------------------|-----------|
| Cpd                                                                                                    | R                                                                                   | R <sub>1</sub> | m. p. (°C) | recrystallization solvent | yield (%) |
| <b>2a</b> [11]                                                                                         | -NH <sub>2</sub>                                                                    | <i>i</i> -Pr   | 62-63      | cyclohexane               | 92        |
| <b>2b</b> [12]                                                                                         | -NH <sub>2</sub>                                                                    | cyclopentyl    | oil        | -                         | 95        |
| <b>2c</b> [13]                                                                                         | -NH <sub>2</sub>                                                                    | Ph             | 107-109    | cyclohexane               | 81        |
| <b>2d</b> [14]                                                                                         | -NH <sub>2</sub>                                                                    | Bn             | 109-111    | cyclohexane               | 82        |
| <b>4a</b>                                                                                              |  | <i>i</i> -Pr   | oil        | -                         | 67        |
| <b>4b</b>                                                                                              |  | cyclopentyl    | oil        | -                         | 77        |
| <b>4c</b> [15]                                                                                         |  | Ph             | 111-113    | cyclohexane               | 88        |
| <b>4d</b>                                                                                              |  | Bn             | 44-45      | <i>n</i> -hexane          | 77        |
| <b>4e</b>                                                                                              |  | <i>i</i> -Pr   | oil        | -                         | 75        |
| <b>4f</b>                                                                                              |  | cyclopentyl    | oil        | -                         | 68        |
| <b>4g</b> [16]                                                                                         |  | Ph             | 113-115    | cyclohexane               | 66        |
| <b>4h</b> [17]                                                                                         |  | Bn             | 68-70      | <i>n</i> -hexane          | 73        |
| <b>4i</b>                                                                                              | -CH=CHPh                                                                            | <i>i</i> -Pr   | oil        | -                         | 70        |

|                |                                                  |              |         |                  |    |
|----------------|--------------------------------------------------|--------------|---------|------------------|----|
| <b>4j</b>      | -CH=CHPh                                         | cyclopentyl  | oil     | -                | 67 |
| <b>4k</b> [18] | -CH=CHPh                                         | Ph           | oil     | -                | 69 |
| <b>4l</b> [19] | -CH=CHPh                                         | Bn           | oil     | -                | 65 |
| <b>4m</b> [20] | -H                                               | Ph           | 98-100  | cyclohexane      | 66 |
| <b>4n</b> [21] | -CH <sub>3</sub>                                 | <i>i</i> -Pr | oil     | -                | 70 |
| <b>4o</b> [22] | -CH <sub>3</sub>                                 | Ph           | 56-58   | <i>n</i> -hexane | 88 |
| <b>4p</b>      | -CH <sub>3</sub>                                 | Bn           | oil     | -                | 82 |
| <b>4q</b> [16] | -CH <sub>2</sub> CH <sub>2</sub> CH <sub>3</sub> | Ph           | 112-114 | cyclohexane      | 92 |

**Table S4.** Chemical and Physical Data of the Intermediates **5a-q**.

| 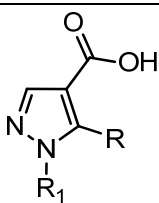<br><b>5a-q</b> |                                                                                     |                |            |                           |           |
|--------------------------------------------------------------------------------------------------|-------------------------------------------------------------------------------------|----------------|------------|---------------------------|-----------|
| Cpd                                                                                              | R                                                                                   | R <sub>1</sub> | m. p. (°C) | recrystallization solvent | yield (%) |
| <b>5a</b>                                                                                        |    | <i>i</i> -Pr   | 138-140    | toluene                   | 87        |
| <b>5b</b>                                                                                        |    | cyclopentyl    | 167-168    | toluene/acetonitrile      | 93        |
| <b>5c</b> [23]                                                                                   |   | Ph             | 184-186    | acetonitrile              | 89        |
| <b>5d</b>                                                                                        |  | Bn             | 170-172    | toluene/acetonitrile      | 77        |
| <b>5e</b>                                                                                        |  | <i>i</i> -Pr   | 164-166    | toluene/acetonitrile      | 73        |
| <b>5f</b>                                                                                        |  | cyclopentyl    | 196-197    | acetonitrile              | 68        |
| <b>5g</b> [22]                                                                                   |  | Ph             | 177-178    | toluene/acetonitrile      | 83        |
| <b>5h</b> [24]                                                                                   |  | Bn             | 166-168    | toluene/acetonitrile      | 76        |
| <b>5i</b>                                                                                        | -CH=CHPh                                                                            | <i>i</i> -Pr   | 167-170    | toluene/acetonitrile      | 80        |
| <b>5j</b>                                                                                        | -CH=CHPh                                                                            | cyclopentyl    | 191-193    | acetonitrile              | 85        |
| <b>5k</b>                                                                                        | -CH=CHPh                                                                            | Ph             | 176-177    | toluene/acetonitrile      | 83        |
| <b>5l</b>                                                                                        | -CH=CHPh                                                                            | Bn             | 136-140    | toluene                   | 78        |
| <b>5m</b> [25]                                                                                   | -H                                                                                  | Ph             | 225-227    | methanol                  | 88        |
| <b>5n</b> [21]                                                                                   | -CH <sub>3</sub>                                                                    | <i>i</i> -Pr   | 151-153    | toluene                   | 92        |

|                |                                                  |    |         |                      |    |
|----------------|--------------------------------------------------|----|---------|----------------------|----|
| <b>5o</b> [22] | -CH <sub>3</sub>                                 | Ph | 163-165 | toluene/acetonitrile | 86 |
| <b>5p</b> [4]  | -CH <sub>3</sub>                                 | Bn | 167-169 | toluene/acetonitrile | 77 |
| <b>5q</b> [22] | -CH <sub>2</sub> CH <sub>2</sub> CH <sub>3</sub> | Ph | 111-113 | cyclohexane          | 71 |

**Table S5.** Elemental Analyses for Compounds **1a-r**.

| compd     | MW     | calculated, % |      |       | found, % |      |       |
|-----------|--------|---------------|------|-------|----------|------|-------|
|           |        | C             | H    | N     | C        | H    | N     |
| <b>1a</b> | 353.43 | 64.57         | 6.56 | 19.82 | 64.78    | 6.67 | 19.59 |
| <b>1b</b> | 379.46 | 66.47         | 6.64 | 18.46 | 66.23    | 6.51 | 18.72 |
| <b>1c</b> | 387.44 | 68.20         | 5.46 | 18.08 | 68.04    | 5.55 | 18.32 |
| <b>1d</b> | 401.47 | 68.81         | 5.77 | 17.44 | 68.59    | 5.65 | 17.69 |
| <b>1e</b> | 364.45 | 69.21         | 6.64 | 15.37 | 69.44    | 6.75 | 15.19 |
| <b>1f</b> | 390.49 | 70.75         | 6.71 | 14.35 | 70.98    | 6.84 | 14.11 |
| <b>1g</b> | 398.47 | 72.34         | 5.57 | 14.06 | 72.59    | 5.68 | 13.82 |
| <b>1h</b> | 412.49 | 72.80         | 5.86 | 13.58 | 73.04    | 5.99 | 13.27 |
| <b>1i</b> | 390.49 | 70.75         | 6.71 | 14.35 | 70.57    | 6.59 | 14.52 |
| <b>1j</b> | 416.53 | 72.09         | 6.78 | 13.45 | 71.88    | 6.70 | 13.64 |
| <b>1k</b> | 424.50 | 73.56         | 5.70 | 13.20 | 73.82    | 5.88 | 12.95 |
| <b>1l</b> | 438.53 | 73.95         | 5.98 | 12.78 | 74.17    | 6.08 | 12.54 |
| <b>1m</b> | 322.37 | 67.07         | 5.63 | 17.38 | 67.29    | 5.74 | 17.17 |
| <b>1n</b> | 302.38 | 63.55         | 7.33 | 18.53 | 63.89    | 7.45 | 18.28 |
| <b>1o</b> | 336.40 | 67.84         | 5.99 | 16.66 | 68.02    | 6.10 | 16.39 |
| <b>1p</b> | 350.42 | 68.55         | 6.33 | 15.99 | 68.36    | 6.29 | 16.17 |
| <b>1q</b> | 364.45 | 69.21         | 6.64 | 15.37 | 69.44    | 6.79 | 15.08 |
| <b>1r</b> | 350.42 | 68.55         | 6.33 | 15.99 | 68.42    | 6.39 | 16.13 |

## Spectral Data for Compounds 1a-r.

### **1a, *N*-((4,6-Dimethyl-2-oxo-1,2-dihydropyridin-3-yl)methyl)-1-isopropyl-5-(1*H*-pyrrol-1-yl)-1*H*-pyrazole-4-carboxamide**

<sup>1</sup>H NMR (DMSO-*d*<sub>6</sub>, 400 MHz, δ, ppm): δ 1.32 (d, 6H, (CH<sub>3</sub>)<sub>2</sub>CH-, *J*= 6.4 Hz), 2.09 (s, 3H, 4,6 dimethylpyridone –CH<sub>3</sub>), 2.10 (s, 3H, 4,6 dimethylpyridone –CH<sub>3</sub>), 3.88 (m, 1H, (CH<sub>3</sub>)<sub>2</sub>CH-), 4.13 (d, 2H, –CH<sub>2</sub>NH-, *J*= 3.6 Hz), 5.82 (s, 1H, –CH- pyridone proton), 6.29 (dd, 2H, pyrrole protons, *J*= 5.6 Hz), 6.95 (dd, 2H, pyrrole protons, *J*= 2.0 Hz), 7.14 (d, 1H, –CH<sub>2</sub>NH-, *J*= 3.6 Hz), 8.00 (s, 1H, pyrazole proton), 11.46 (s, 1H, pyridone –NH) ppm; <sup>13</sup>C NMR (DMSO-*d*<sub>6</sub>, 100 MHz, δ, ppm): δ 18.5, 19.1, 21.7 (2C), 32.8, 51.4, 100.2, 111.1, 112.9 (2C), 116.0, 121.6 (2C), 138.1, 147.3, 151.6, 158.0, 163.6, 165.1 ppm; MS (EI) calc: *m/z*: 353.1852 [M]<sup>+</sup> found: *m/z*: 353.1845 [M]<sup>+</sup>

### **1b, 1-Cyclopentyl-*N*-((4,6-dimethyl-2-oxo-1,2-dihydropyridin-3-yl)methyl)-5-(1*H*-pyrrol-1-yl)-1*H*-pyrazole-4-carboxamide**

<sup>1</sup>H NMR (DMSO-*d*<sub>6</sub>, 400 MHz, δ, ppm): δ 1.53 (m, 2H, cyclopentyl protons), 1.78 (m, 2H, cyclopentyl protons), 1.87 (m, 4H, cyclopentyl protons), 2.09 (s, 3H, 4,6 dimethylpyridone –CH<sub>3</sub>), 2.10 (s, 3H, 4,6 dimethylpyridone –CH<sub>3</sub>), 4.07 (m, 1H, cyclopentyl (CH<sub>2</sub>)<sub>2</sub>CH-), 4.12 (d, 2H, –CH<sub>2</sub>NH-, *J*= 4.8 Hz), 5.82 (s, 1H, –CH- pyridone proton), 6.29 (d, 2H, pyrrole protons, *J*= 5.4 Hz), 6.94 (d, 2H, pyrrole protons, *J*= 2.0 Hz), 7.15 (t, 1H, –CH<sub>2</sub>NH-, *J*= 3.6 Hz), 7.98 (s, 1H, pyrazole proton), 11.46 (s, 1H, pyridone –NH) ppm; <sup>13</sup>C NMR (DMSO-*d*<sub>6</sub>, 100 MHz, δ, ppm): δ 18.5, 19.1, 24.6 (2C), 32.8, 33.4 (2C), 62.2, 99.8, 111.1, 112.9 (2C), 116.0, 121.6 (2C), 139.1, 146.4, 151.6, 158.0, 163.6, 165.1 ppm; MS (EI) calc: *m/z*: 379.2008 [M]<sup>+</sup> found: *m/z*: 379.2011 [M]<sup>+</sup>

### **1c, *N*-((4,6-Dimethyl-2-oxo-1,2-dihydropyridin-3-yl)methyl)-1-phenyl-5-(1*H*-pyrrol-1-yl)-1*H*-pyrazole-4-carboxamide**

<sup>1</sup>H NMR (DMSO-*d*<sub>6</sub>, 400 MHz, δ, ppm): δ 2.11 (s, 3H, 4,6 dimethylpyridone –CH<sub>3</sub>), 2.50 (s, 3H, 4,6 dimethylpyridone –CH<sub>3</sub>), 4.17 (d, 2H, –CH<sub>2</sub>NH-, *J*= 4.8 Hz), 5.84 (s, 1H, –CH- pyridone proton), 6.17 (d, 2H, aromatic protons, *J*= 1.6 Hz), 6.85 (d, 2H, aromatic protons, *J*= 1.6 Hz), 7.11 (d, 2H, aromatic protons, *J*= 8.0 Hz), 7.36 (d, 2H, aromatic protons, *J*= 6.4 Hz), 7.49 (t, 1H, –CH<sub>2</sub>NH-, *J*= 4.0 Hz), 8.24 (s, 1H, pyrazole proton), 11.48 (s, 1H, pyridone –NH) ppm; <sup>13</sup>C NMR (DMSO-*d*<sub>6</sub>, 100 MHz, δ, ppm): δ 18.5, 19.1, 32.8, 101.3, 111.1, 112.9 (2C), 116.0, 121.6 (2C), 125.2 (2C), 127.2, 129.5 (2C), 138.5, 139.6, 141.7, 151.6, 158.0, 163.6, 165.1 ppm; MS (EI) calc: *m/z*: 387.1695 [M]<sup>+</sup> found: *m/z*: 387.1689 [M]<sup>+</sup>

### **1d, 1-Benzyl-*N*-((4,6-dimethyl-2-oxo-1,2-dihydropyridin-3-yl)methyl)-5-(1*H*-pyrrol-1-yl)-1*H*-pyrazole-4-carboxamide**

<sup>1</sup>H NMR (DMSO-*d*<sub>6</sub>, 400 MHz, δ, ppm): δ 2.09 (s, 3H, 4,6 dimethylpyridone –CH<sub>3</sub>), 2.10 (s, 3H, 4,6 dimethylpyridone –CH<sub>3</sub>), 4.13 (d, 2H, –CH<sub>2</sub>NH-, *J*= 4.8 Hz), 5.01 (s, 2H, –NCH<sub>2</sub>Ph), 5.82 (s, 1H, –CH- pyridone proton), 6.26 (s, 2H, pyrrole protons), 6.87 (s, 2H, pyrrole protons, *J*= 1.6 Hz), 6.96 (d, 2H, aromatic protons, *J*= 6.8 Hz), 7.27 (m, 3H, aromatic protons), 7.36 (t, 1H, –CH<sub>2</sub>NH-, *J*= 4.0 Hz), 8.02 (s, 1H, pyrazole proton), 11.46 (s, 1H, pyridone –NH) ppm; <sup>13</sup>C NMR (DMSO-*d*<sub>6</sub>, 100 MHz, δ, ppm): δ 18.5, 19.1, 32.8, 51.1, 100.5, 111.1, 112.9 (2C), 116.0,

121.6 (2C), 127.6, 128.4 (2C), 129.0 (2C), 136.3, 139.6, 141.5, 151.6, 158.0, 163.6, 165.1 ppm; MS (EI) calc:  $m/z$ : 401.1852 [M]<sup>+</sup> found:  $m/z$ : 401.1845 [M]<sup>+</sup>

**1e, *N*-((4,6-Dimethyl-2-oxo-1,2-dihydropyridin-3-yl)methyl)-1-isopropyl-5-phenyl-1*H*-pyrazole-4-carboxamide**

<sup>1</sup>H NMR (DMSO-*d*<sub>6</sub>, 400 MHz,  $\delta$ , ppm):  $\delta$  1.31 (d, 6H, (CH<sub>3</sub>)<sub>2</sub>CH-,  $J$ = 5.6 Hz), 2.07 (s, 3H, 4,6 dimethylpyridone -CH<sub>3</sub>), 2.10 (s, 3H, 4,6 dimethylpyridone -CH<sub>3</sub>), 4.15 (d, 2H, -CH<sub>2</sub>NH-,  $J$ = 4.8 Hz), 4.17 (m, 1H, (CH<sub>3</sub>)<sub>2</sub>CH-), 5.82 (s, 1H, -CH- pyridone proton), 7.28 (t, 1H, -CH<sub>2</sub>NH-,  $J$ = 4.0 Hz), 7.35 (m, 2H, aromatic protons), 7.48 (m, 3H, aromatic protons), 7.96 (s, 1H, pyrazole proton), 11.44 (s, 1H, pyridone -NH) ppm; <sup>13</sup>C NMR (DMSO-*d*<sub>6</sub>, 100 MHz,  $\delta$ , ppm):  $\delta$  18.5, 19.1, 21.7 (2C), 32.8, 53.1, 111.1, 116.0, 124.5, 128.5 (2C), 128.6, 128.9 (2C), 130.8, 141.5, 151.6, 153.9, 158.0, 163.6, 165.3 ppm; MS (EI) calc:  $m/z$ : 364.1899 [M]<sup>+</sup> found:  $m/z$ : 364.1901 [M]<sup>+</sup>

**1f, 1-Cyclopentyl-*N*-((4,6-dimethyl-2-oxo-1,2-dihydropyridin-3-yl)methyl)-5-phenyl-1*H*-pyrazole-4-carboxamide**

<sup>1</sup>H NMR (DMSO-*d*<sub>6</sub>, 400 MHz,  $\delta$ , ppm):  $\delta$  1.51 (m, 2H, cyclopentyl protons), 1.80 (m, 2H, cyclopentyl protons), 1.89 (m, 4H, cyclopentyl protons), 2.07 (s, 3H, 4,6 dimethylpyridone -CH<sub>3</sub>), 2.10 (s, 3H, 4,6 dimethylpyridone -CH<sub>3</sub>), 4.10 (d, 2H, -CH<sub>2</sub>NH-,  $J$ = 5.2 Hz), 4.33 (m, 1H, cyclopentyl proton -N-CH-), 5.82 (s, 1H, -CH- pyridone proton), 7.30 (t, 1H, -CH<sub>2</sub>NH-,  $J$ = 4.8 Hz), 7.34 (m, 2H, aromatic protons), 7.48 (m, 3H, aromatic protons), 7.95 (s, 1H, pyrazole proton), 11.44 (s, 1H, pyridone -NH) ppm; <sup>13</sup>C NMR (DMSO-*d*<sub>6</sub>, 100 MHz,  $\delta$ , ppm):  $\delta$  18.5, 19.1, 24.6 (2C), 32.8, 33.4 (2C), 64.1, 111.1, 116.0, 122.8, 128.5 (2C), 128.6, 128.9 (2C), 130.8, 142.0, 151.6, 154.1, 158.0, 163.6, 165.3 ppm; MS (EI) calc:  $m/z$ : 390.2056 [M]<sup>+</sup> found:  $m/z$ : 390.2060 [M]<sup>+</sup>

**1g, *N*-((4,6-Dimethyl-2-oxo-1,2-dihydropyridin-3-yl)methyl)-1,5-diphenyl-1*H*-pyrazole-4-carboxamide**

<sup>1</sup>H NMR (DMSO-*d*<sub>6</sub>, 400 MHz,  $\delta$ , ppm):  $\delta$  2.10 (s, 3H, 4,6 dimethylpyridone -CH<sub>3</sub>), 2.11 (s, 3H, 4,6 dimethylpyridone -CH<sub>3</sub>), 4.17 (d, 2H, -CH<sub>2</sub>NH-,  $J$ = 5.2 Hz), 5.84 (s, 1H, -CH- pyridone proton), 7.17 (d, 2H, aromatic protons,  $J$ = 6.4 Hz), 7.24 (d, 2H, aromatic protons,  $J$ = 6.4 Hz), 7.32 (m, 6H, aromatic protons), 7.60 (t, 1H, -CH<sub>2</sub>NH-,  $J$ = 4.8 Hz), 8.15 (s, 1H, pyrazole proton), 11.46 (s, 1H, pyridone -NH) ppm; <sup>13</sup>C NMR (DMSO-*d*<sub>6</sub>, 100 MHz,  $\delta$ , ppm):  $\delta$  18.5, 19.1, 32.8, 111.1, 116.0, 124.1 (2C), 125.8, 127.1, 128.4 (2C), 128.6, 128.9 (2C), 129.1 (2C), 130.6, 139.6, 140.2, 146.0, 151.6, 158.0, 163.6, 165.3 ppm; MS (EI) calc:  $m/z$ : 398.1743 [M]<sup>+</sup> found:  $m/z$ : 398.1740 [M]<sup>+</sup>

**1h, 1-Benzyl-*N*-((4,6-dimethyl-2-oxo-1,2-dihydropyridin-3-yl)methyl)-5-phenyl-1*H*-pyrazole-4-carboxamide**

<sup>1</sup>H NMR (DMSO-*d*<sub>6</sub>, 400 MHz,  $\delta$ , ppm):  $\delta$  2.08 (s, 3H, 4,6 dimethylpyridone -CH<sub>3</sub>), 2.10 (s, 3H, 4,6 dimethylpyridone -CH<sub>3</sub>), 4.11 (d, 2H, -CH<sub>2</sub>NH-,  $J$ = 4.0 Hz), 5.14 (s, 2H, -NCH<sub>2</sub>Ph), 5.82 (s, 1H, -CH- pyridone proton), 6.90 (d, 2H, aromatic protons,  $J$ = 5.6 Hz), 7.27 (m, 5H, aromatic protons), 7.43 (m, 4H, aromatic protons and -CH<sub>2</sub>NH-), 8.01 (s, 1H, pyrazole proton), 11.45 (s, 1H, pyridone -NH) ppm; <sup>13</sup>C NMR (DMSO-*d*<sub>6</sub>, 100 MHz,  $\delta$ , ppm):  $\delta$  18.5, 19.1, 32.8, 52.9, 111.1, 116.0, 120.6, 127.6, 128.0 (2C), 128.4 (2C), 128.6 (3C), 128.9 (2C), 130.9, 136.0, 140.6, 142.5, 151.6, 158.0, 163.6, 165.3 ppm; MS (EI) calc:  $m/z$ : 412.1899 [M]<sup>+</sup> found:  $m/z$ : 412.1893 [M]<sup>+</sup>

**1i, *N*-((4,6-Dimethyl-2-oxo-1,2-dihydropyridin-3-yl)methyl)-1-isopropyl-5-styryl-1*H*-pyrazole-4-carboxamide**

<sup>1</sup>H NMR (DMSO-*d*<sub>6</sub>, 400 MHz,  $\delta$ , ppm):  $\delta$  1.40 (d, 6H, (CH<sub>3</sub>)<sub>2</sub>CH-,  $J$ = 5.6 Hz), 2.10 (s, 3H, 4,6 dimethylpyridone -CH<sub>3</sub>), 2.15 (s, 3H, 4,6 dimethylpyridone -CH<sub>3</sub>), 4.24 (d, 2H, -CH<sub>2</sub>NH-,  $J$ = 4.0 Hz), 4.82 (m, 1H, (CH<sub>3</sub>)<sub>2</sub>CH-), 5.84 (s, 1H, -CH- pyridone proton), 7.18 (d, 1H, vinyl proton,  $J$ = 16.8 Hz), 7.38 (m, 4H, aromatic protons and vinyl proton), 7.59 (m, 2H, aromatic protons), 7.83 (t, 1H, -CH<sub>2</sub>NH-,  $J$ = 5.0 Hz),

7.87 (s, 1H, pyrazole proton), 11.46 (s, 1H, pyridone -NH) ppm; <sup>13</sup>C NMR (DMSO-*d*<sub>6</sub>, 100 MHz, δ, ppm): δ 18.5, 19.1, 21.7 (2C), 32.8, 52.3, 111.1, 116.0, 121.8, 122.0, 126.3 (2C), 129.0 (2C), 129.8, 131.6, 136.6, 143.8, 145.3, 151.6, 158.0, 163.6, 165.4 ppm; MS (EI) calc: *m/z*: 390.2056 [M]<sup>+</sup> found: *m/z*: 390.2058 [M]<sup>+</sup>

**1j, 1-Cyclopentyl-*N*-((4,6-dimethyl-2-oxo-1,2-dihydropyridin-3-yl)methyl)-5-styryl-1*H*-pyrazole-4-carboxamide**

<sup>1</sup>H NMR (DMSO-*d*<sub>6</sub>, 400 MHz, δ, ppm): δ 1.64 (m, 2H, cyclopentyl protons), 1.83 (m, 2H, cyclopentyl protons), 1.97 (m, 2H, cyclopentyl protons), 2.06 (m, 2H, cyclopentyl protons), 2.10 (s, 3H, 4,6 dimethylpyridone -CH<sub>3</sub>), 2.16 (s, 3H, 4,6 dimethylpyridone -CH<sub>3</sub>), 4.24 (d, 2H, -CH<sub>2</sub>NH-, *J*= 5.2 Hz), 4.98 (m, 1H, cyclopentyl proton -N-CH-), 5.84 (s, 1H, -CH- pyridone proton), 7.20 (d, 1H, vinyl proton, *J*= 16.8 Hz), 7.38 (m, 4H, aromatic protons and vinyl proton), 7.34 (m, 1H, aromatic proton), 7.41 (m, 3H, aromatic and vinyl protons), 7.60 (d, 2H, aromatic protons, *J*= 7.2 Hz), 7.85 (t, 1H, -CH<sub>2</sub>NH- *J*= 5.1 Hz), 7.87 (s, 1H, pyrazole proton), 11.45 (s, 1H, pyridone -NH) ppm; <sup>13</sup>C NMR (DMSO-*d*<sub>6</sub>, 100 MHz, δ, ppm): δ 18.5, 19.1, 24.6 (2C), 32.8, 33.4 (2C), 63.9, 111.1, 116.0, 120.6, 122.1, 126.3 (2C), 129.0 (2C), 129.8, 131.6, 136.6, 143.4, 144.3, 151.6, 158.0, 163.6, 165.4 ppm; MS (EI) calc: *m/z*: 416.2212 [M]<sup>+</sup> found: *m/z*: 416.2215 [M]<sup>+</sup>

**1k, *N*-((4,6-Dimethyl-2-oxo-1,2-dihydropyridin-3-yl)methyl)-1-phenyl-5-styryl-1*H*-pyrazole-4-carboxamide**

<sup>1</sup>H NMR (DMSO-*d*<sub>6</sub>, 400 MHz, δ, ppm): δ 2.12 (s, 3H, 4,6 dimethylpyridone -CH<sub>3</sub>), 2.19 (s, 3H, 4,6 dimethylpyridone -CH<sub>3</sub>), 4.31 (d, 2H, -CH<sub>2</sub>NH-, *J*= 4.0 Hz), 5.87 (s, 1H, -CH- pyridone proton), 6.85 (d, 1H, vinyl proton, *J*= 16.8 Hz), 7.32 (m, 6H, aromatic protons and vinyl proton), 7.53 (m, 5H, aromatic protons), 8.09 (t, 1H, -CH<sub>2</sub>NH-, *J*= 5.1 Hz), 8.12 (s, 1H, pyrazole proton), 11.47 (s, 1H, pyridone -NH) ppm; <sup>13</sup>C NMR (DMSO-*d*<sub>6</sub>, 100 MHz, δ, ppm): δ 18.5, 19.1, 32.8, 111.1, 116.0, 117.9, 122.2, 123.0 (2C), 126.3 (2C), 127.2, 129.0 (2C), 129.1 (2C), 129.8, 132.6, 136.6, 136.7, 139.5, 141.8, 151.6, 158.0, 163.6, 165.4 ppm; MS (EI) calc: *m/z*: 424.1899 [M]<sup>+</sup> found: *m/z*: 424.1903 [M]<sup>+</sup>

**1l, 1-Benzyl-*N*-((4,6-dimethyl-2-oxo-1,2-dihydropyridin-3-yl)methyl)-5-styryl-1*H*-pyrazole-4-carboxamide**

<sup>1</sup>H NMR (DMSO-*d*<sub>6</sub>, 400 MHz, δ, ppm): δ 2.11 (s, 3H, 4,6 dimethylpyridone -CH<sub>3</sub>), 2.18 (s, 3H, 4,6 dimethylpyridone -CH<sub>3</sub>), 4.27 (d, 2H, -CH<sub>2</sub>NH-, *J*= 4.4 Hz), 5.57 (s, 2H, -NCH<sub>2</sub>-Ph), 5.86 (s, 1H, -CH- pyridone proton), 7.14 (d, 2H, aromatic protons), 7.24-7.40 (m, 7H, aromatic protons and vinyl protons), 7.47 (d, 3H, aromatic protons, *J*= 7.6 Hz), 7.95 (s, 1H, pyrazole proton), 7.97 (t, 1H, -CH<sub>2</sub>NH-, *J*= 5.8 Hz), 11.46 (s, 1H, pyridone -NH) ppm; <sup>13</sup>C NMR (DMSO-*d*<sub>6</sub>, 100 MHz, δ, ppm): δ 18.5, 19.1, 32.8, 52.8, 111.1, 116.0, 118.8, 121.7, 126.3 (2C), 127.6, 128.0 (2C), 128.4 (2C), 129.0 (2C), 129.8, 131.1, 136.0, 136.6, 140.7, 142.8, 151.6, 158.0, 163.6, 165.4 ppm; MS (EI) calc: *m/z*: 438.2056 [M]<sup>+</sup> found: *m/z*: 438.2051 [M]<sup>+</sup>

**1m, *N*-((4,6-Dimethyl-2-oxo-1,2-dihydropyridin-3-yl)methyl)-1-phenyl-1*H*-pyrazole-4-carboxamide**

<sup>1</sup>H NMR (DMSO-*d*<sub>6</sub>, 400 MHz, δ, ppm): δ 2.13 (s, 3H, 4,6 dimethylpyridone -CH<sub>3</sub>), 2.19 (s, 3H, 4,6 dimethylpyridone -CH<sub>3</sub>), 4.28 (d, 2H, -CH<sub>2</sub>NH-, *J*= 4.8 Hz), 5.88 (s, 1H, -CH- pyridone proton), 7.35 (t, 1H, aromatic proton), 7.52 (m, 2H, aromatic protons), 7.82 (d, 2H, aromatic protons, *J*= 7.6 Hz), 8.05 (t, 1H, -CH<sub>2</sub>NH-, *J*= 4.8 Hz), 8.15 (s, 1H, pyrazole proton), 8.98 (s, 1H, pyrazole proton), 11.50 (s, 1H, pyridone -NH) ppm; <sup>13</sup>C NMR (DMSO-*d*<sub>6</sub>, 100 MHz, δ, ppm): δ 18.5, 19.1, 32.8, 111.1, 116.0, 119.2 (2C), 119.4, 127.5, 129.4 (2H), 132.3, 136.8, 139.4, 151.6, 158.0, 162.3, 163.61 ppm; MS (EI) calc: *m/z*: 322.1430 [M]<sup>+</sup> found: *m/z*: 322.1433 [M]<sup>+</sup>

**1n, *N*-((4,6-Dimethyl-2-oxo-1,2-dihydropyridin-3-yl)methyl)-1-isopropyl-5-methyl-1*H*-pyrazole-4-carboxamide**



<sup>1</sup>H NMR (DMSO-*d*<sub>6</sub>, 400 MHz, δ, ppm): δ 1.33 (d, 6H, (CH<sub>3</sub>)<sub>2</sub>CH-, *J* = 4.4 Hz), 2.11 (s, 3H, 4,6 dimethylpyridone –CH<sub>3</sub>), 2.15 (s, 3H, 4,6 dimethylpyridone –CH<sub>3</sub>), 2.50 (s, 3H, 5 methylpyrazole –CH<sub>3</sub>), 4.22 (d, 2H, –CH<sub>2</sub>NH-, *J* = 4.8 Hz), 4.51 (m, 1H, (CH<sub>3</sub>)<sub>2</sub>CH-), 5.85 (s, 1H, –CH-pyridone proton), 7.76 (t, 1H, –CH<sub>2</sub>NH-, *J* = 7.6 Hz), 7.87 (s, 1H, pyrazole proton), 11.47 (s, 1H, pyridone –NH) ppm; <sup>13</sup>C NMR (DMSO-*d*<sub>6</sub>, 100 MHz, δ, ppm): δ 11.9, 18.5, 19.1, 21.7 (2C), 32.8, 51.0, 111.1, 116.0, 125.9, 147.2, 148.8, 151.6, 158.0, 163.6, 165.9 ppm; MS (EI) calc: *m/z*: 362.1743 [M]<sup>+</sup> found: *m/z*: 362.1744 [M]<sup>+</sup>

**1o, *N*-((4,6-dimethyl-2-oxo-1,2-dihydropyridin-3-yl)methyl)-5-methyl-1-phenyl-1H-pyrazole-4-carboxamide**

<sup>1</sup>H NMR (DMSO-*d*<sub>6</sub>, 400 MHz, δ, ppm): δ 2.13 (s, 3H, 4,6-dimethylpyridone –CH<sub>3</sub>), 2.19 (s, 3H, 4,6-dimethylpyridone –CH<sub>3</sub>), 2.51 (s, 3H, 5-methylpyrazole –CH<sub>3</sub>), 4.27 (d, 2H, –CH<sub>2</sub>NH-, *J* = 4.8 Hz), 5.87 (s, 1H, –CH pyridone proton), 7.53 (m, 5H, aromatic protons), 7.96 (t, 1H, –CH<sub>2</sub>NH-, *J* = 4.8 Hz), 8.13 (s, 1H, pyrazole proton), 11.48 (br s, 1H, pyridone NH) ppm; <sup>13</sup>C NMR (DMSO-*d*<sub>6</sub>, 100 MHz, δ, ppm): δ 11.1, 18.5, 19.1, 32.8, 111.1, 116.0, 123.3 (2C), 126.9, 127.2, 129.1 (2C), 139.2, 142.6, 146.6, 151.5, 158.0, 163.6, 165.9 ppm; MS (EI) calc: *m/z*: 336.1586 [M]<sup>+</sup> found: *m/z*: 336.1590 [M]<sup>+</sup>.

**1p, 1-Benzyl-*N*-((4,6-dimethyl-2-oxo-1,2-dihydropyridin-3-yl)methyl)-5-methyl-1H-pyrazole-4-carboxamide**

<sup>1</sup>H NMR (DMSO-*d*<sub>6</sub>, 400 MHz, δ, ppm): δ 2.11 (s, 3H, 4,6 dimethylpyridone –CH<sub>3</sub>), 2.16 (s, 3H, 4,6 dimethylpyridone –CH<sub>3</sub>), 2.44 (s, 3H, 5 methylpyrazole –CH<sub>3</sub>), 4.22 (d, 2H, –CH<sub>2</sub>NH-, *J* = 5.2 Hz), 5.31 (s, 2H, –NCH<sub>2</sub>-Ph), 5.85 (s, 1H, –CH- pyridone proton), 7.09 (d, 2H, aromatic protons, *J* = 6.8 Hz), 7.31 (m, 3H, aromatic protons), 7.84 (t, 1H, –CH<sub>2</sub>NH-, *J* = 4.8 Hz), 7.94 (s, 1H, pyrazole proton), 11.47 (s, 1H, pyridone –NH) ppm; <sup>13</sup>C NMR (DMSO-*d*<sub>6</sub>, 100 MHz, δ, ppm): δ 11.8, 18.5, 19.1, 32.8, 52.6, 111.1, 116.0, 123.6, 127.6, 128.4 (2C), 128.7 (2C), 136.1, 147.4, 150.1, 151.6, 158.0, 163.6, 165.9 ppm; MS (EI) calc: *m/z*: 350.1743 [M]<sup>+</sup> found: *m/z*: 350.1739 [M]<sup>+</sup>

**1q, *N*-((4,6-Dimethyl-2-oxo-1,2-dihydropyridin-3-yl)methyl)-1-phenyl-5-propyl-1H-pyrazole-4-carboxamide**

<sup>1</sup>H NMR (DMSO-*d*<sub>6</sub>, 400 MHz, δ, ppm): δ 0.72 (t, 3H, CH<sub>3</sub>CH<sub>2</sub>CH<sub>2</sub>-, *J* = 7.2 Hz), 1.40 (m, 2H, CH<sub>3</sub>CH<sub>2</sub>CH<sub>2</sub>-), 2.13 (s, 3H, 4,6 dimethylpyridone –CH<sub>3</sub>), 2.17 (s, 3H, 4,6 dimethylpyridone –CH<sub>3</sub>), 2.92 (t, 2H, CH<sub>3</sub>CH<sub>2</sub>CH<sub>2</sub>-), 4.28 (d, 2H, –CH<sub>2</sub>NH-, *J* = 7.6 Hz), 5.87 (s, 1H, –CH- pyridone proton), 7.50 (m, 5H, aromatic protons), 7.95 (t, 1H, –CH<sub>2</sub>NH-, *J* = 4.0 Hz), 8.11 (s, 1H, pyrazole proton), 11.50 (s, 1H, pyridone –NH) ppm; <sup>13</sup>C NMR (DMSO-*d*<sub>6</sub>, 100 MHz, δ, ppm): δ 13.6, 18.5, 19.1, 21.8, 25.0, 32.8, 111.1, 116.0, 119.9, 124.2 (2C), 127.2, 128.9 (2C), 139.8, 145.7, 146.6, 151.6, 158.0, 163.6, 165.6 ppm; MS (EI) calc: *m/z*: 364.1899 [M]<sup>+</sup> found: *m/z*: 364.1904 [M]<sup>+</sup>

**1r, *N*-((4,6-Dimethyl-2-oxo-1,2-dihydropyridin-3-yl)methyl)-2-(5-methyl-1-phenyl-1H-pyrazol-4-yl)acetamide**

<sup>1</sup>H NMR (DMSO-*d*<sub>6</sub>, 400 MHz, δ, ppm): δ 2.11 (s, 3H, 4,6 dimethylpyridone –CH<sub>3</sub>), 2.13 (s, 3H, 4,6 dimethylpyridone –CH<sub>3</sub>), 2.27 (s, 3H, pyrazole –CH<sub>3</sub>), 3.26 (s, 2H, –CH<sub>2</sub>CONH-), 4.09 (d, 2H, –CH<sub>2</sub>NH-, *J* = 5.2 Hz), 5.85 (s, 1H, –CH- pyridone proton), 7.39 (t, 1H, aromatic proton, *J* = 7.6 Hz), 7.42–7.54 (m, 5H, aromatic and pyrazole protons), 7.91 (t, 1H, –CH<sub>2</sub>NH-, *J* = 4.4 Hz), 11.47 (s, 1H, pyridone –NH) ppm; <sup>13</sup>C NMR (DMSO-*d*<sub>6</sub>, 100 MHz, δ, ppm): δ 10.3, 18.5, 19.1, 30.3, 33.0, 109.1, 111.1, 116.0, 123.3 (2C), 127.2, 129.1 (2C), 136.6, 138.0, 139.3, 151.6, 158.0, 163.6, 170.8 ppm; MS (EI) calc: *m/z*: 356.1743 [M]<sup>+</sup> found: *m/z*: 356.1747 [M]<sup>+</sup>

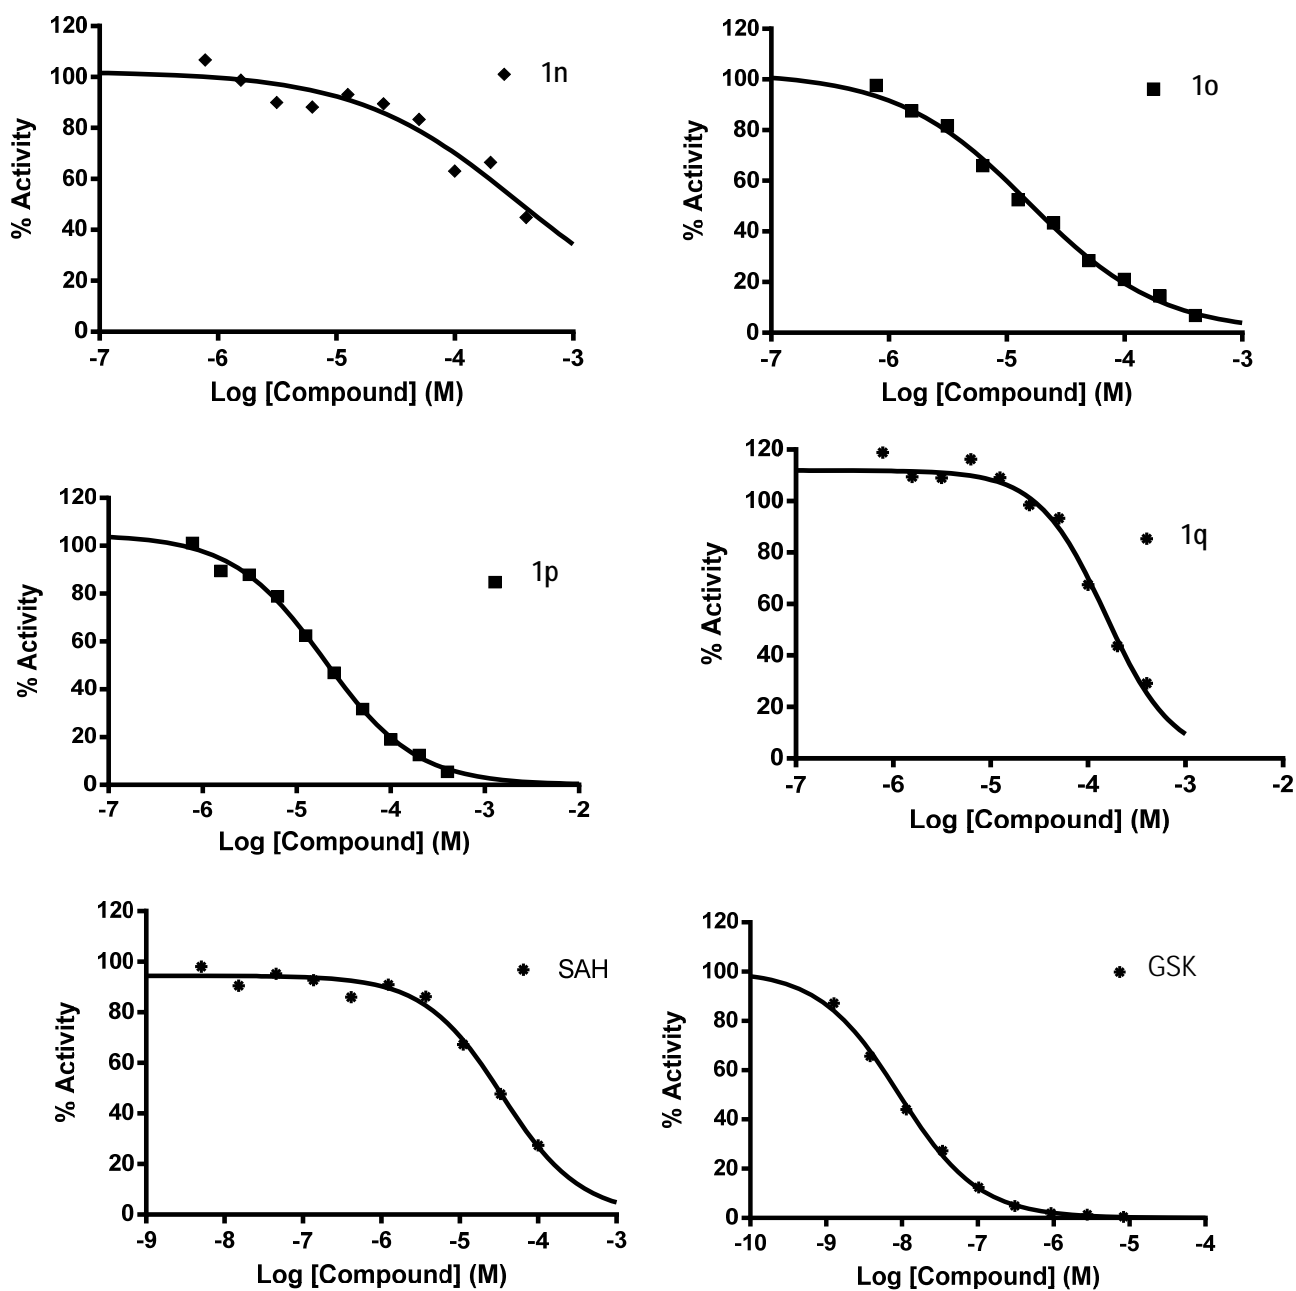

**Figure S1.** Determination of  $IC_{50}$  values against EZH2/PRC2 for **1n**, **1o**, **1p**, and **1q**. SAH and GSK126 have been used as reference drugs.

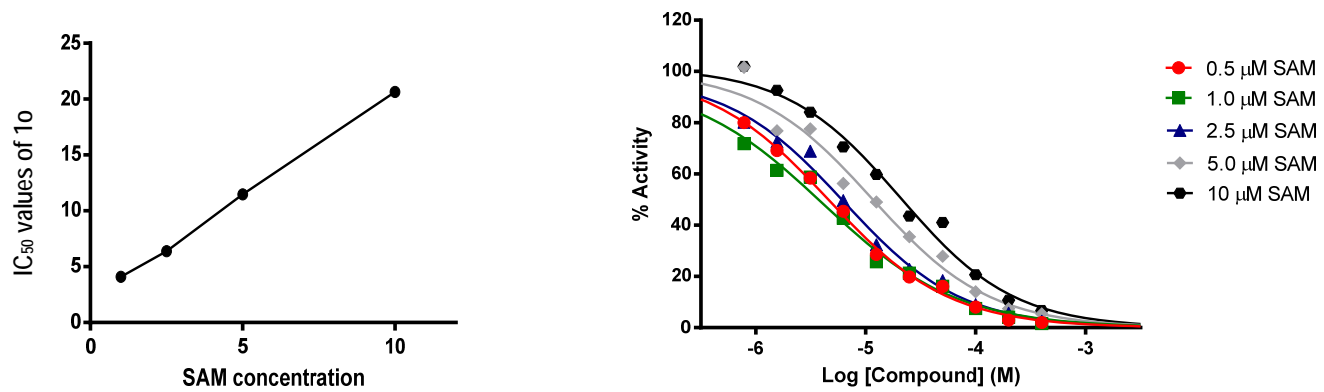

**Figure S2.** SAM competition experiments. Left, dependence of **1o**  $IC_{50}$  values with increasing SAM concentration. Right, inhibitory effects of **1o** vs EZH2/PRC2 at increasing SAM concentrations.

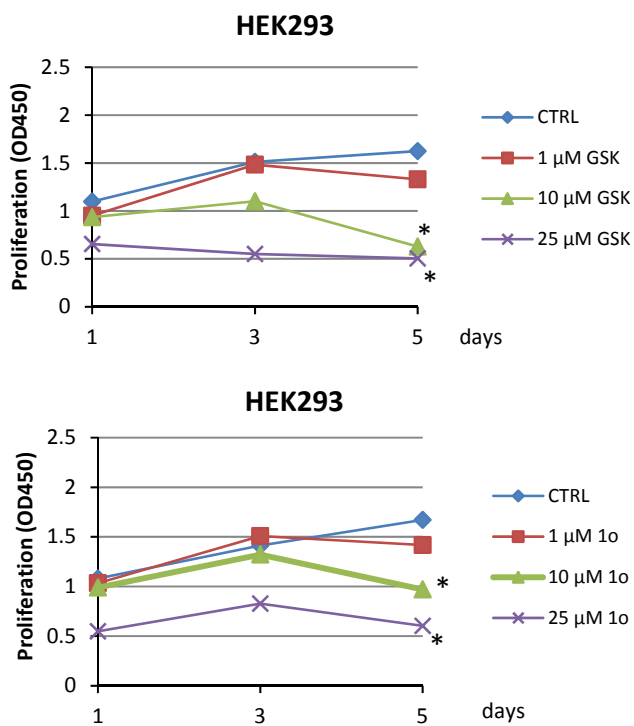

**Figure S3.** Cytotoxicity of **1o** and GSK126 in non-cancer cells. Antiproliferative effects of GSK126 (up) and of **1o** (down) in human embryonic kidney HEK293 cells treated with 1, 10 and 25 μM of the compound for 5 days (MTS Cell Proliferation Assay).

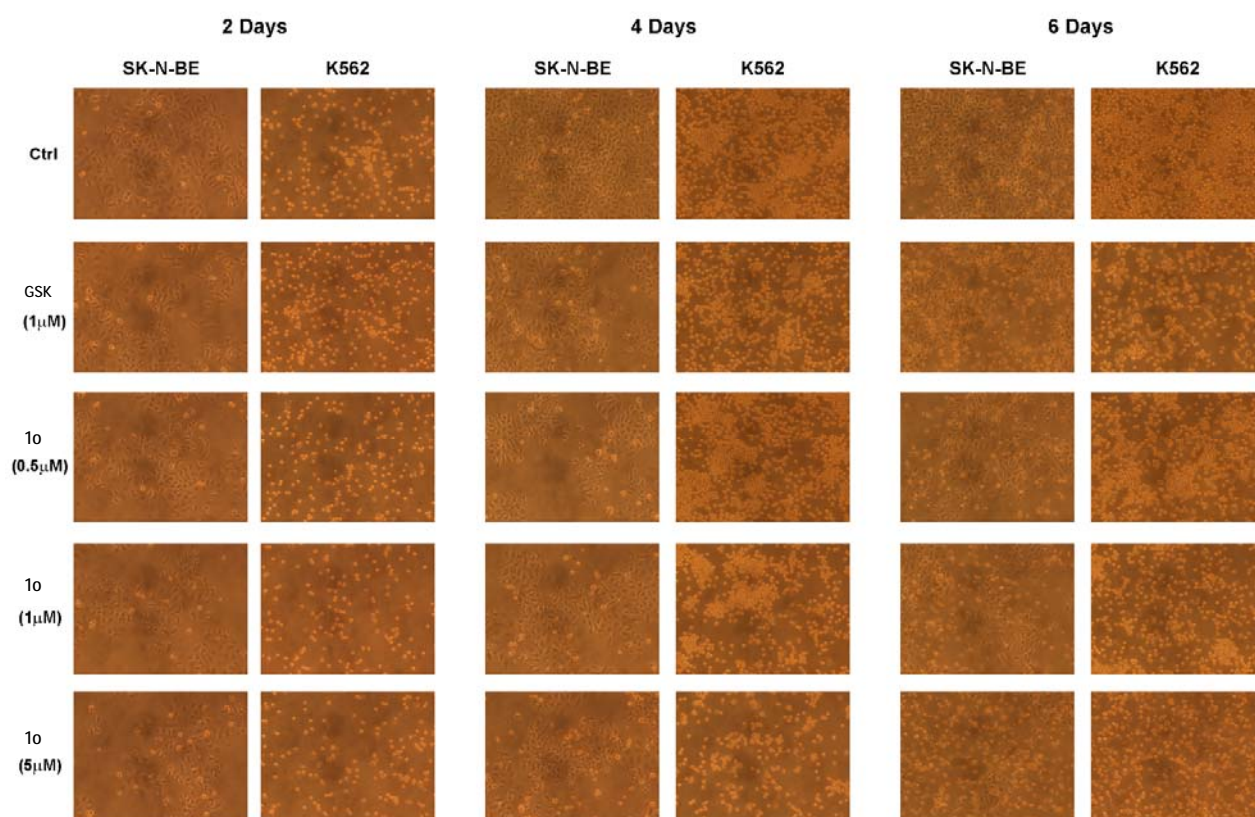

**Figure S4.** SK-N-BE and K562 cells were either left untreated or treated with 0.5, 1 and 5  $\mu$ M **1o** for 2, 4 and 6 days. GSK126 (1  $\mu$ M) was used as a reference drug. Cell morphology was evaluated by optical microscopy and picture taken.

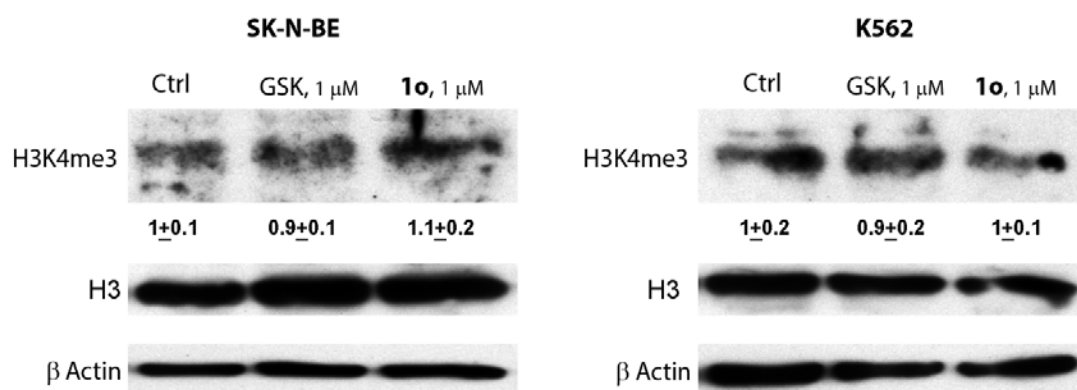

**Figure S5.** Western blot analysis showing the levels of H3K4me3 and histone H3 after treatment with GSK126 and **1o** (both at 1  $\mu$ M) in SK-N-BE and K562 cells. The relative densitometric analyses for H3K4me3 (arbitrary units) are reported.  $\beta$ -Actin was used for normalization.

## References

1. Xia, Y.; Chackalamannil, S.; Czarniecki, M.; Tsai, H.; Vaccaro, H.; Cleven, R.; Cook, J.; Fawzi, A.; Watkins, R.; Zhang, H. Synthesis and Evaluation of Polycyclic Pyrazolo[3,4-D]Pyrimidines as Pde1 and Pde5 Cgmp Phosphodiesterase Inhibitors. *J. Med. Chem.* 1997, 40, 4372-4377.
2. Boldron, C.; Besse, A.; Bordes, M.-F.; Tissandie, S.; Yvon, X.; Gau, B.; Badorc, A.; Rousseaux, T.; Barre, G.; Meneyrol, J.; Zech, G.; Nazare, M.; Fossey, V.; Pflieger, A.-M.; Bonnet-Lignon, S.; Millet, L.; Briot, C.; Dol, F.; Herault, J.-P.; Savi, P.; Lassalle, G.; Delesque, N.; Herbert, J.-M.; Bono, F. N-[6-(4-Butanoyl-5-Methyl-1H-Pyrazol-1-yl)Pyridazin-3-yl]-5-Chloro-1-[2-(4-Methylpiperazin-1-yl)-2-Oxoethyl]-1H-Indole-3-Carboxamide (Sar216471), a Novel Intravenous and Oral, Reversible, and Directly Acting P2y12 Antagonist. *J. Med. Chem.* 2014, 57, 7293-7316.
3. Verma, S. K.; Tian, X.; LaFrance, L. V.; Duquenne, C.; Suarez, D. P.; Newlander, K. A.; Romeril, S. P.; Burgess, J. L.; Grant, S. W.; Brackley, J. A.; Graves, A. P.; Scherzer, D. A.; Shu, A.; Thompson, C.; Ott, H. M.; Aller, G. S.; Machutta, C. A.; Diaz, E.; Jiang, Y.; Johnson, N. W.; Knight, S. D.; Kruger, R. G.; McCabe, M. T.; Dhanak, D.; Tummino, P. J.; Creasy, C. L.; Miller, W. H. Identification of Potent, Selective, Cell-Active Inhibitors of the Histone Lysine Methyltransferase Ezh2. *ACS Med. Chem. Lett.* 2012, 3, 1091-1096.
4. Albrecht, B. K.; Audia, J. E.; Cook, A. S.; Dakin, L. A.; Duplessis, M.; Gehling, V. S.; Harmange, J.-C.; Naveschuk, C. G.; Vaswani, R. G. Preparation of Heteroaryl Amides as Modulators of Methyl Modifying Enzymes. WO2013120104A2, 2013.
5. Kurihara, T.; Uno, T.; Sakamoto, Y. Reaction of Ethyl 3-Ethoxymethylene-2,4-Dioxovalerate with Monosubstituted Hydrazines. *J. Heterocycl. Chem.* 1980, 17, 231-233.
6. Blackledge, Charles William, Jr.; Burgess, Joelle Lorraine; Johnson, Neil W.; Kaspavec, Jiri; Knight, Steven David; Lafrance, Louis V., III; Luengo, Juan I.; Miller, William Henry; Newlander, Kenneth Allen; Romeril, Stuart Paul; et al. Preparation of N-[(4,6-dimethyl-2-oxo-1,2-dihydropyridin-3-yl)methyl] amides as enhancers of zeste homolog 2 (EZH2) inhibitors. *PCT Int. Appl.*, WO 2014177982 A1 20141106, 2014.

7. Svete, J.; Aljaz-Rozic, M.; Stanovnik, B. 2-Benzoyl-2-Ethoxycarbonylvinyl and 2-Benzoylamino-2-Methoxycarbonylvinyl as N-Protecting Groups in Peptide Synthesis. Their Application in the Synthesis of Dehydropeptide Derivatives Containing N-Terminal 3-Heteroaryl-amino-2,3-Dehydroalanine. *J. Heterocycl. Chem.* **1997**, *34* (1), 177-193.
8. Cumming, J. G.; Debreczeni, J. E.; Edfeldt, F.; Evertsson, E.; Harrison, M.; Holdgate, G. A.; James, M. J.; Lamont, S. G.; Oldham, K.; Sullivan, J. E.; Wells, S. L. Discovery and Characterization of Mapk-Activated Protein Kinase-2 Prevention of Activation Inhibitors. *J. Med. Chem.* **2015**, *58* (1), 278-293.
9. Kim, C. K.; Krasavage, B. A.; Maggiulli, C. A. A New Synthesis of 5,7-Dicarboxy-2,1-Benzisoxazolin-3-One. *J. Heterocycl. Chem.* **1985**, *22* (1), 127-128.
10. Boldron, C.; Besse, A.; Bordes, M.-F.; Tissandie, S.; Yvon, X.; Gau, B.; Badorc, A.; Rousseaux, T.; Barre, G.; Meneyrol, J.; Zech, G.; Nazare, M.; Fossey, V.; Pflieger, A.-M.; Bonnet-Lignon, S.; Millet, L.; Briot, C.; Dol, F.; Herault, J.-P.; Savi, P.; Lassalle, G.; Delesque, N.; Herbert, J.-M.; Bono, F. N-[6-(4-Butanoyl-5-Methyl-1H-Pyrazol-1-yl)Pyridazin-3-yl]-5-Chloro-1-[2-(4-Methylpiperazin-1-yl)-2-Oxoethyl]-1H-Indole-3-Carboxamide (Sar216471), a Novel Intravenous and Oral, Reversible, and Directly Acting P2y12 Antagonist. *J. Med. Chem.* **2014**, *57* (17), 7293-7316.
11. Ohki, H.; Kawabata, K.; Inamoto, Y.; Okuda, S.; Kamimura, T.; Sakane, K. Studies on 3'-Quaternary Ammonium Cephalosporins—lv. Synthesis and Antibacterial Activity of 3'-(2-Alkyl-3-Aminopyrazolium)Cephalosporins Related to Fk037. *Biorg. Med. Chem.* **1997**, *5* (8), 1685-1694.
12. Anderson, K. W.; Fotouhi, N.; Gillespie, P.; Goodnow, R. A., Jr.; Guertin, K. R.; Haynes, N.-E.; Myers, M. P.; Pietranico-Cole, S. L.; Qi, L.; Rossman, P. L.; Scott, N. R.; Thakkar, K. C.; Tilley, J. W.; Zhang, Q. Preparation of Pyrazole-4-Carboxamide Derivatives as 11-Beta-Hydroxysteroid Dehydrogenase Form I (11-Beta-Hsd1) Inhibitors. WO2007107470A2, 2007.
13. Li, J.-F.; Zhu, Y.-Q.; Wang, X.; Yang, H.-Z. Synthesis and Herbicidal Activities of a Series of Di(Aminopyrazoly) Ketone Derivatives. *J. Heterocycl. Chem.* **2007**, *44* (4), 749-755.
14. Xia, Y.; Chackalamannil, S.; Czarniecki, M.; Tsai, H.; Vaccaro, H.; Cleven, R.; Cook, J.; Fawzi, A.; Watkins, R.; Zhang, H. Synthesis and Evaluation of Polycyclic Pyrazolo[3,4-D]Pyrimidines as Pde1 and Pde5 Cgmp Phosphodiesterase Inhibitors. *J. Med. Chem.* **1997**, *40* (26), 4372-4377.



15. Stefancich, G.; Corelli, F.; Massa, S.; Silvestri, R.; Di Santo, R. Heterocyclic Systems. Vii Synthesis of 1h-Pyrazolo[3,4-E]Indolizine Derivatives. *J. Heterocycl. Chem.* **1987**, *24* (4), 1199-1202.
16. Menozzi, G.; Schenone, P.; Mosti, L.; Mattioli, F. Synthesis of 5-Substituted 1-Aryl-1h-Pyrazole-4-Acetonitriles, 4-Methyl-1-Phenyl-1h-Pyrazole-3-Carbonitriles and Pharmacologically Active 1-Aryl-1h-Pyrazole-4-Acetic Acids. *J. Heterocycl. Chem.* **1993**, *30* (4), 997-1002.
17. Momose, Y.; Maekawa, T.; Odaka, H.; Kimura, H. Preparation of Pyrazolyl- and Pyrrolylalkanoic Acid Derivatives with Hypoglycemic and Hypolipidemic Activity. WO2001038325A1, 2001.
18. Deshayes, C.; Chabannet, M.; Gelin, S. Synthesis of Some 1H, or 2H,4H-Benzo[4,5]Cyclohepta[1,2-c]Pyrazol-4-One Derivatives. *Heterocycles* **1983**, *20* (8), 1581-1585.
19. Deshayes, C.; Chabannet, M.; Gelin, S. Synthesis of Some 5-Aryl-4,5-Dihydropyrazolo[1,5-a]Quinolines and 5-Aryl-4,5-Dihydro-10H-Pyrazolo[1,5-b][2]Benzazepines from 1-Phenyl- or 1-Benzyl-5-Styrylpyrazoles. *Synthesis* **1982**, *1982* (12), 1088-1089.
20. Strah, S.; Golobič, A.; Golič, L.; Stanovnik, B. Alkyl (E,Z)-2-(2-Benzoyl-2-Ethoxycarbonyl-1-Ethenyl)Amino-3-Dimethylaminopropenoates in the Synthesis of Fused Pyrimidinones. A Facile Route to 3-Aminoazino-4H-Pyrimidin-4-Ones. *J. Heterocycl. Chem.* **1997**, *34* (5), 1511-1517.
21. Flynn, D. L.; Petillo, P. A.; Kaufman, M. D. Preparation of Pyridine-Based Compounds as Kinase Inhibitors Useful for Treatment of Proliferative Diseases. US20110189167A1, 2011.
22. Menozzi, G.; Mosti, L.; Schenone, P. Reaction of 2-Dimethylaminomethylene-1,3-Diones with Dinucleophiles. Vi. Synthesis of Ethyl or Methyl 1,5-Disubstituted 1h-Pyrazole-4-Carboxylates. *J. Heterocycl. Chem.* **1987**, *24* (6), 1669-1675.
23. Massa, S.; Mai, A.; Artico, M.; Corelli, F. Heterocyclic System. Xi. Synthesis of 1H,4H-Pyrazolo[4,3-b]Pyrrolizine and 2H,4H-Pyrazolo[4,3-b]Pyrrolizine Derivatives. *J. Heterocycl. Chem.* **1990**, *27* (6), 1805-1808.
24. Miura, S.; Shimada, M.; Marui, S.; Tamura, N.; Nakada, Y.; Tozawa, R.; Sakamoto, J.; Funabashi, Y.; Hosono, H. Preparation of Heterocyclic Amide Compounds as Fxr Inhibitors. WO2007052843A1, 2007.

25. Hohwy, M.; Spadola, L.; Lundquist, B.; Hawtin, P.; Dahmén, J.; Groth-Clausen, I.; Nilsson, E.; Persdotter, S.; von Wachenfeldt, K.; Folmer, R. H. A.; Edman, K. Novel Prostaglandin D Synthase Inhibitors Generated by Fragment-Based Drug Design. *J. Med. Chem.* **2008**, *51* (7), 2178-2186.
